# Supplementary material for: Cataract Services are Leaving Widows Behind: Examples from National Cross-Sectional Surveys in Nigeria and Sri Lanka
Source: PubMed Central journal article supplement (PMC6843674; doi:10.3390/ijerph16203854), 2019-10-12
Supplement: ijerph-16-03854-s001.pdf [file ijerph-16-03854-s001.pdf]

**Supplemental Table S1:** Cataract blindness, cataract surgical coverage (CSC) and effective cataract surgical coverage (eCSC) in subgroups of women and men aged  $\geq 40$  years in Nigeria (2005–7) and Sri Lanka (2012–14)

| Country   | Subgroup*         | n           |             | Cataract blindness<br>% (95%CI) |                      | CSC<br>% (95%CI)        |                         | eCSC<br>% (95%CI)       |                         |
|-----------|-------------------|-------------|-------------|---------------------------------|----------------------|-------------------------|-------------------------|-------------------------|-------------------------|
|           |                   | Women       | Men         | Women                           | Men                  | Women                   | Men                     | Women                   | Men                     |
| Nigeria   | Urban Married     | 1065        | 1318        | 0.6 (0.2–1.2)                   | 0.6 (0.3–1.2)        | 71.0 (52.0–85.8)        | 80.0 (56.3–94.3)        | 35.5 (19.2–54.6)        | 35.0 (15.4–59.2)        |
|           | Urban Not-married | 618         | 50          | 2.9 (1.7–4.6)                   | 2.0 (0.1–10.6)       | 56.3 (37.7–73.6)        | **                      | 25.0 (11.5–43.4)        | **                      |
|           | Rural Married     | 3750        | 4624        | 0.5 (0.3–0.7)                   | 1.0 (0.7–1.3)        | 48.2 (37.3–59.3)        | 56.3 (43.3–68.6)        | 18.8 (11.2–28.8)        | 25.0 (15.0–37.4)        |
|           | Rural Not-married | 1911        | 252         | 5.3 (4.3–6.4)                   | 5.2 (2.8–8.7)        | 25.2 (17.8–33.8)        | 42.9 (17.7–71.1)        | 8.9 (4.5–15.4)          | 7.1 (0.2–33.9)          |
|           | <b>Overall</b>    | <b>7344</b> | <b>6244</b> | <b>1.9 (1.6–2.3)</b>            | <b>1.1 (0.9–1.4)</b> | <b>41.3 (35.4–47.4)</b> | <b>58.6 (48.2–68.4)</b> | <b>17.0 (12.7–22.0)</b> | <b>24.2 (16.2–33.9)</b> |
| Sri Lanka | Urban Married     | 268         | 239         | 0                               | 0.4 (0–2.3)          | 100                     | 100                     | 100                     | 71.4 (29.0–96.3)        |
|           | Urban Not-married | 161         | 23          | 1.8 (0.4–5.3)                   | 0                    | 85.0 (62.1–97.0)        | **                      | 55.0 (31.5–76.9)        | **                      |
|           | Rural Married     | 2122        | 1916        | 0.2 (0.1–0.5)                   | 0.9 (0.6–1.4)        | 90.9 (80.0–97.0)        | 69.6 (55.9–81.2)        | 69.1 (55.2–80.9)        | 46.4 (33.0–60.3)        |
|           | Rural Not-married | 872         | 178         | 3.0 (2.0–4.3)                   | 1.1 (0.1–4.0)        | 68.5 (56.6–78.9)        | 71.4 (29.0–96.3)        | 37.0 (26.0–49.1)        | 28.6 (3.7–71.0)         |
|           | <b>Overall</b>    | <b>3423</b> | <b>2356</b> | <b>1.0 (0.7–1.4)</b>            | <b>0.9 (0.5–1.3)</b> | <b>80.1 (73.0–86.1)</b> | <b>73.6 (61.9–83.3)</b> | <b>53.8 (45.7–61.6)</b> | <b>48.6 (36.7–60.7)</b> |

\*Not-married includes: widowed, divorced, separated or single

\*\*Too few not-married urban men to include results

CSC= number of people with operated cataract as a proportion of those having operable plus operated cataract; operate cataract = best-corrected visual acuity worse than 3/60;

eCSC= number of people with operated cataract and a good outcome (i.e. presenting VA 6/18 or better) as a proportion of those having operable plus operated cataract.
